# Supplementary material for: Fructose-mineralized black phosphorus for syncretic bone regeneration and tumor suppression
Source: Royal Society of Chemistry journal article supplement (doi:10.1039/d4tb00564c), 2024-01-01
Supplement: d4tb00564c1.pdf [file d4tb00564c1.pdf]

**Fructose-mineralized black phosphorus for syncretic bone  
regeneration and tumor suppression**

Jun Shu<sup>1</sup>, Yao Wang<sup>1</sup>, Guangpeng Zhang, Tingting Xu, Xuedong Shu, Junwei Zhang,

Fang Wu, Jing He\*

*National Engineering Research Center for Biomaterials, College of Biomedical  
Engineering, Sichuan University, Chengdu 610064, PR China*

E-mail addresses: [jinghe30@scu.edu.cn](mailto:jinghe30@scu.edu.cn) (J. He).

<sup>1</sup> These authors contributed equally.

Table 1 The FPKM value of caspase-related genes in 143B cells

|        | BPs         | CaBPs-Na <sub>2</sub> FDP@CaCl <sub>2</sub> |
|--------|-------------|---------------------------------------------|
| CASP10 | 0.053080496 | 0.063459744                                 |
| CASP8  | 1.869275062 | 1.990203874                                 |
| CASP2  | 2.285581498 | 2.650714718                                 |
| CASP9  | 1.745872398 | 1.945718747                                 |
| CASP6  | 2.680524084 | 2.78385306                                  |
| CASP3  | 4.058383087 | 3.411986617                                 |
| CASP7  | 4.850134827 | 5.206478798                                 |

Table 2 The FPKM value of antiapoptotic protein-related genes in 143B cells

|               | BPs         | CaBPs-Na <sub>2</sub> FDP@CaCl <sub>2</sub> |
|---------------|-------------|---------------------------------------------|
| BCL7C         | 1.898976044 | 1.19400846                                  |
| BCL11A        | 1.390650972 | 1.039109939                                 |
| BCL2A1        | 2.311306951 | 1.327446026                                 |
| BCL2L11       | 3.353531698 | 2.7781435                                   |
| BCL6B         | 0.093403523 | 0.05790164                                  |
| BCL2L2-PABPN1 | 0.256859689 | 0.106153007                                 |
| BCL2          | 0.84737357  | 0.728097519                                 |

Table 3 The FPKM value of cytochrome C-related genes in 143B cells

|        | BPs         | CaBPs-Na <sub>2</sub> FDP@CaCl <sub>2</sub> |
|--------|-------------|---------------------------------------------|
| COX10  | 8.550076862 | 9.104788702                                 |
| HCCS   | 18.96683517 | 21.52894445                                 |
| BCS1L  | 23.88108426 | 27.47380575                                 |
| UQCC1  | 12.13500339 | 12.29255645                                 |
| COX7A2 | 62.5016334  | 64.98999722                                 |
| COX4I2 | 0.101105707 | 0.470072174                                 |
| COX16  | 2.469890594 | 2.59194413                                  |
| COX6B2 | 0.181827199 | 0.371963562                                 |
| COA7   | 24.99799611 | 25.64044259                                 |
| COX18  | 1.580457863 | 1.839265197                                 |
| COX11  | 7.68481663  | 8.314658855                                 |
| COA6   | 9.519226065 | 9.841191074                                 |
| COX14  | 6.345581803 | 6.484088343                                 |
| COA4   | 55.32734702 | 57.82671561                                 |
| COX8C  | 0.124796528 | 0.348130942                                 |
| COX20  | 0.118406509 | 0.233966339                                 |

|        |             |             |
|--------|-------------|-------------|
| UQCC3  | 0.790117692 | 0.813419009 |
| PET100 | 0.467771218 | 0.492958122 |

Table 4 The FPKM value of proapoptotic protein-related genes in 143B cells

|        | BPs         | CaBPs-Na <sub>2</sub> FDP@CaCl <sub>2</sub> |
|--------|-------------|---------------------------------------------|
| BAX    | 26.77351038 | 29.92831607                                 |
| BID    | 9.610349091 | 10.27390595                                 |
| BAD    | 0.871237587 | 1.031076343                                 |
| HIBADH | 4.619447054 | 5.831573799                                 |
| RBAK   | 3.625465564 | 4.094227991                                 |
| NFKBID | 0.507615145 | 0.826021761                                 |
| TMBIM1 | 11.06300514 | 12.55937229                                 |
| TMBIM4 | 0.698516883 | 0.726849244                                 |

Table 5 The FPKM value of the death effector domain-related genes in 143B cells

|       | BPs         | CaBPs-Na <sub>2</sub> FDP@CaCl <sub>2</sub> |
|-------|-------------|---------------------------------------------|
| DAPK2 | 0.039610405 | 0.050644332                                 |
| DAPK3 | 32.39997769 | 33.65422725                                 |
| DAPK1 | 1.336393174 | 1.475661461                                 |
| DEDD  | 6.52180196  | 6.621768914                                 |
| DEDD2 | 11.64606321 | 13.81744192                                 |
| PIDD1 | 3.373321553 | 3.985361011                                 |

Table 6 The FPKM value of DNA damage-related genes in 143B cells

|         | BPs         | CaBPs-Na <sub>2</sub> FDP@CaCl <sub>2</sub> |
|---------|-------------|---------------------------------------------|
| DDB1    | 21.22568881 | 23.53925495                                 |
| DDIT4   | 15.71234245 | 20.54947809                                 |
| DDIT3   | 15.52556652 | 35.2735398                                  |
| DDI2    | 3.588048769 | 3.816709679                                 |
| GADD45B | 102.0923154 | 120.9373459                                 |
| GADD45G | 2.249544669 | 3.850754505                                 |

Table 7 The FPKM value of TNF receptor family-related genes in 143B cells

|         | BPs         | CaBPs-Na <sub>2</sub> FDP@CaCl <sub>2</sub> |
|---------|-------------|---------------------------------------------|
| TNFRSF9 | 0.031935655 | 0.059391555                                 |
| TNFRSF8 | 0.035487785 | 0.065997541                                 |

|           |             |             |
|-----------|-------------|-------------|
| TNFRSF19  | 0.436555975 | 0.72576643  |
| TNFRSF14  | 0.054425264 | 0.070851239 |
| TNFRSF11B | 0.107706558 | 0.32549504  |

Table 8 The FPKM values of ATP hydrolysis-related genes in 143B cells

|          | BPs      | CaBPs-Na <sub>2</sub> FDP@CaCl <sub>2</sub> |
|----------|----------|---------------------------------------------|
| ATP2B3   | 0.012922 | 0.084109                                    |
| ATP6V1G2 | 0.062485 | 0.174307                                    |
| ATP2A3   | 0.363074 | 0.73909                                     |
| ATP8A1   | 0.138717 | 0.269192                                    |
| ATAD3C   | 0.084953 | 0.063196                                    |
| KIF25    | 0.0574   | 0.032024                                    |
| SWSAP1   | 0.19859  | 0.110797                                    |
| ATP2B2   | 0.085703 | 0.042911                                    |
| SHOC1    | 0.199465 | 0.097619                                    |
| FIGNL2   | 0.143761 | 0.053471                                    |
| CARNS1   | 0.095435 | 0.033278                                    |
| ATP1A3   | 0.033916 | 0.010512                                    |
| RAD50    | 0.11524  | 0.035719                                    |

Table 9 The FPKM value of osteogenesis-related genes in MC3T3-E1 cells

|         | BPs      | CaBPs-Na <sub>2</sub> FDP@CaCl <sub>2</sub> |
|---------|----------|---------------------------------------------|
| Areg    | 0.121514 | 0.520924                                    |
| Wnt3    | 0.047997 | 0.102881                                    |
| Bmp8a   | 0.920829 | 1.118469                                    |
| Bmper   | 0.840076 | 3.3067                                      |
| Bmpr1b  | 0.049527 | 0.106159                                    |
| Bmpr2   | 5.861905 | 6.137229                                    |
| Cebpa   | 0.364058 | 0.750334                                    |
| Col11a2 | 1.696759 | 1.979608                                    |
| Crim1   | 5.935134 | 6.769997                                    |
| Fgf2    | 0.293886 | 0.793252                                    |
| Gdpd2   | 0.432444 | 0.549292                                    |
| Hira    | 0.938337 | 1.38754                                     |
| Hoxa2   | 0.249532 | 0.713152                                    |
| Il6     | 1.03372  | 2.183164                                    |
| Noct    | 3.026763 | 3.681851                                    |
| Osr2    | 0.061126 | 0.131022                                    |

|         |          |          |
|---------|----------|----------|
| Prkd1   | 1.333727 | 1.537691 |
| Ptger4  | 0.988261 | 1.36857  |
| Sema4d  | 0.182651 | 0.432718 |
| Sirt7   | 4.516944 | 6.147262 |
| Smad1   | 4.196717 | 5.19265  |
| Tnfaip6 | 1.769948 | 4.163961 |
| Twist2  | 0.046515 | 0.24926  |
| Wnt11   | 0.285501 | 0.611962 |
| Wnt4    | 2.816205 | 4.376429 |

Table 10 The FPKM value of 143B ATP hydrolysis

|         | BPs      | CaBPs-Na <sub>2</sub> FDP@CaCl <sub>2</sub> |
|---------|----------|---------------------------------------------|
| Camta1  | 0.167196 | 0.287791                                    |
| Camta2  | 5.302208 | 4.375878                                    |
| Carhsp1 | 24.07279 | 39.97286                                    |
| Tgif1   | 10.05261 | 19.98627                                    |
| Tgif2   | 0.134848 | 0.123876                                    |
| Smad5   | 13.15226 | 12.97618                                    |
| Smad4   | 28.21936 | 30.45682                                    |
| Smad2   | 11.14737 | 11.52356                                    |
| Smad7   | 4.049393 | 5.809836                                    |
| Smad1   | 4.196717 | 5.19265                                     |
| Nfatc2  | 0.034893 | 0.112188                                    |
| Nfatc3  | 14.31572 | 15.8217                                     |
| Nfatc1  | 6.57252  | 5.783496                                    |
| Runx1   | 3.892036 | 8.05298                                     |
| Runx2   | 15.0864  | 14.41389                                    |
| Runx3   | 12.08443 | 11.22763                                    |
| Crebbp  | 7.469209 | 8.285483                                    |
| Creb1   | 5.022667 | 5.210254                                    |
| Creb3l4 | 0.395699 | 0.659687                                    |
| Creb3l3 | 0.318189 | 0.813187                                    |
| Crebrf  | 8.88699  | 10.48527                                    |
| Crebzf  | 21.29349 | 26.97197                                    |
| Crem    | 0.450808 | 0.764982                                    |
| Plscr3  | 13.31945 | 10.32922                                    |
| Plscr1  | 7.28603  | 15.45672                                    |
| Plscr2  | 4.31776  | 6.120237                                    |
| Plscr4  | 2.035698 | 1.145959                                    |

|        |          |          |
|--------|----------|----------|
| Capns1 | 93.34014 | 93.7757  |
| Capn1  | 15.28903 | 19.10494 |
| Capn10 | 2.47991  | 2.639603 |
| Capn9  | 0.06116  | 0.163868 |
| Capn5  | 0.228794 | 0.40387  |
| Capn15 | 5.656638 | 6.200516 |
| Capn12 | 1.609488 | 2.172767 |
| Capn3  | 0.427594 | 0.824881 |

---
